# Supplementary material
Source: publisher site journal article supplement (https://www.dovepress.com/article/553809)
Supplement: Supplementary file 1 [file 20251001_Remimazolam_BP_Supplementary%20material_1_1.docx]

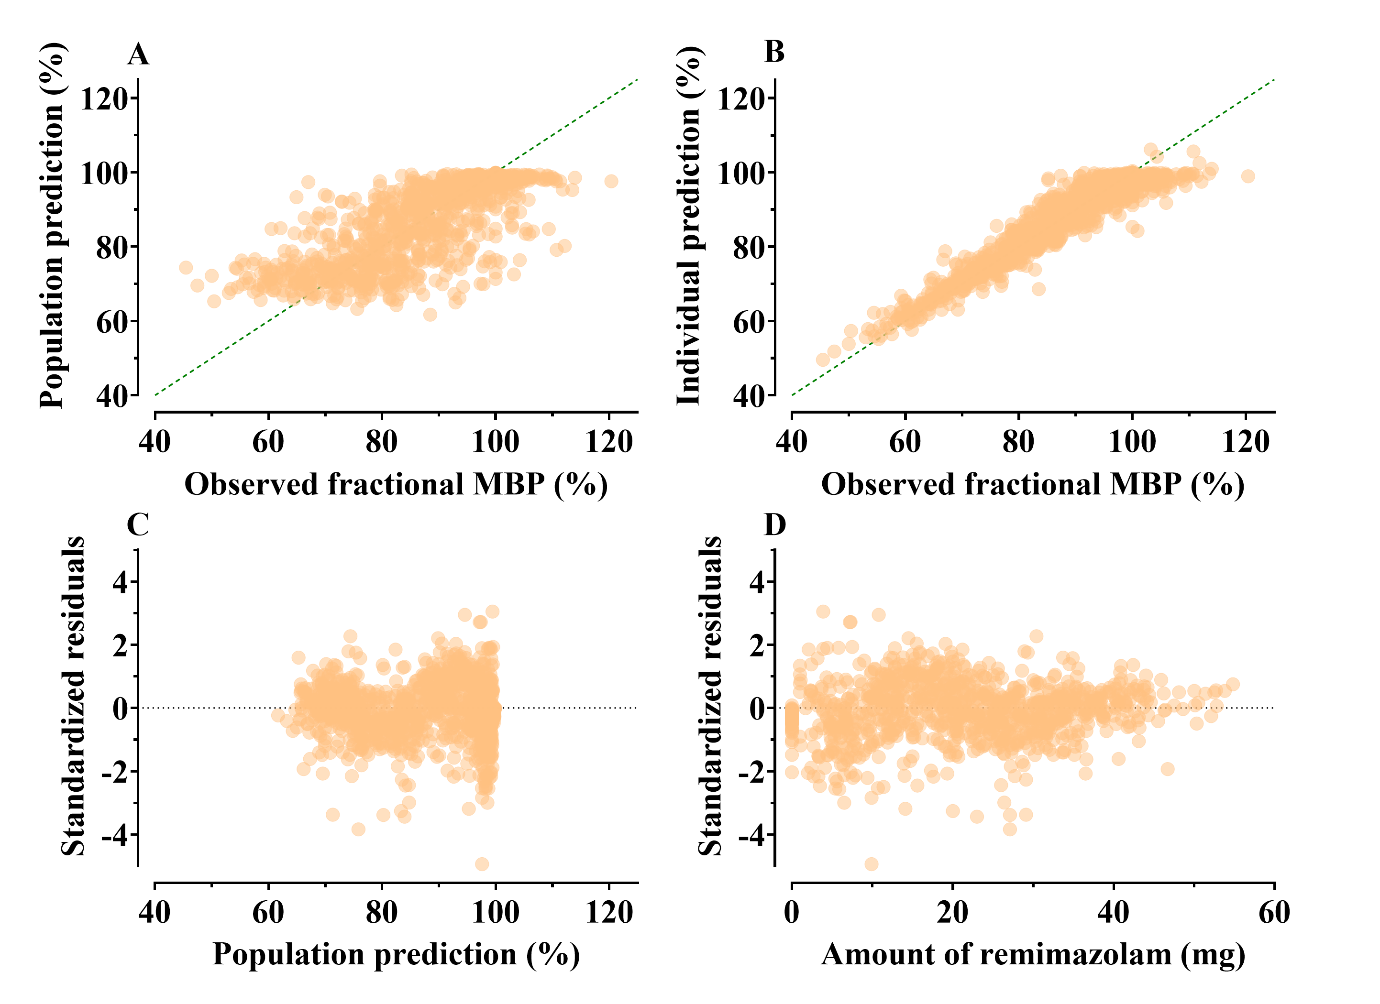


**Figure S1.** Goodness-of-fit plots for the final pharmacodynamic model. (A) Population predictions versus observed fractional mean blood pressure (MBP). (B) Individual predictions versus observed fractional MBP. (C) Standardized residuals versus population predictions. (D) Standardized residuals versus cumulative remimazolam dose. The green dashed line represents the line of identity in plots (A) and (B), and the horizontal dotted line represents zero in plots (C) and (D).
